# Supplementary material for: An ensemble-variational inversion system for the estimation of ammonia emissions using CrIS satellite ammonia retrievals
Source: Copernicus journal article supplement (doi:10.5194/acp-22-6595-2022), 2022-05-20
Supplement: Supplementary file 1 [file acp-22-6595-2022-supplement.pdf]

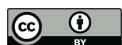

*Supplement of*

## **An ensemble-variational inversion system for the estimation of ammonia emissions using CrIS satellite ammonia retrievals**

**Michael Sitwell et al.**

*Correspondence to:* Michael Sitwell (michael.sitwell@ec.gc.ca)

The copyright of individual parts of the supplement might differ from the article licence.

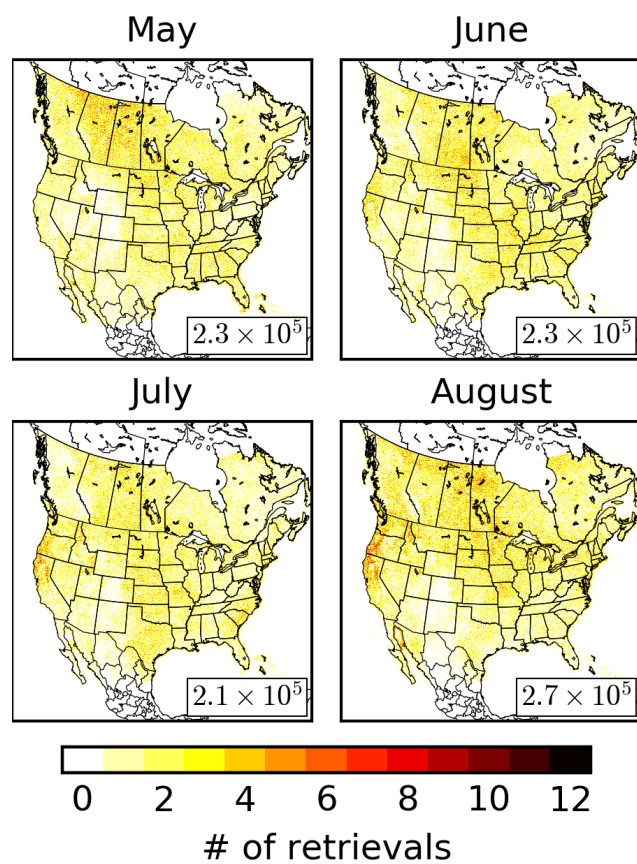

**Figure S1.** Number of CrIS ammonia retrievals used in the inversions binned on the GEM-MACH grid for May to August 2016. The total number of retrievals for each month is displayed in the lower right corner of each panel.

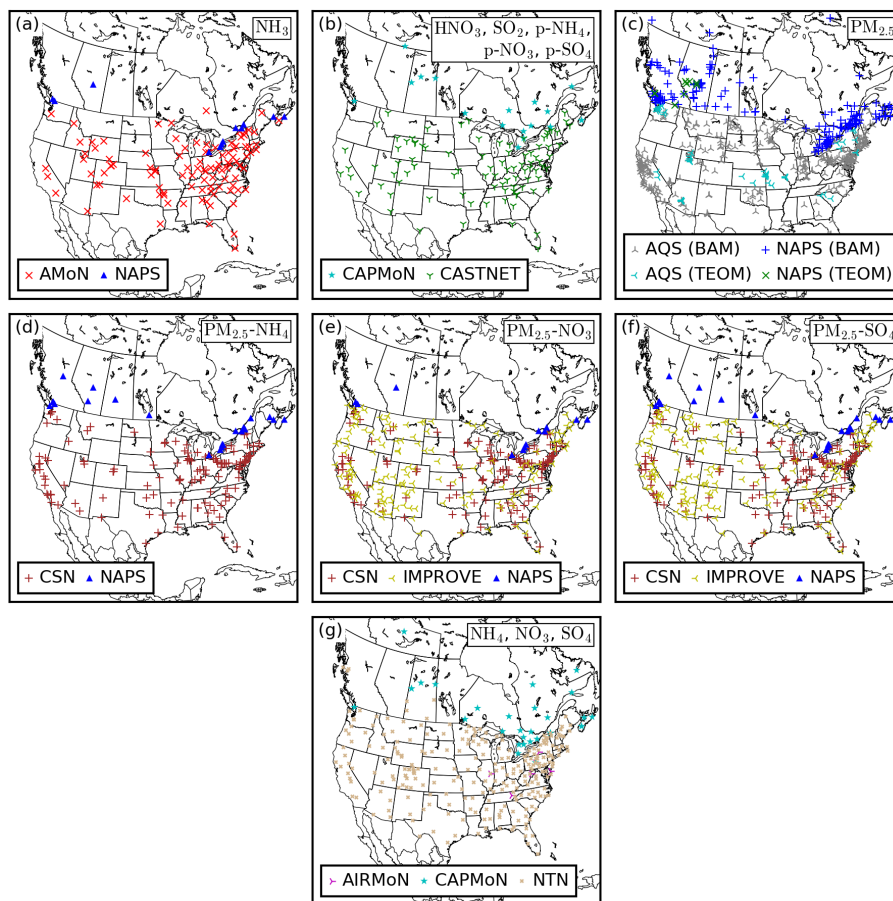

**Figure S2.** Observation sites measuring the atmospheric surface concentrations of (a) ammonia, (b) nitric acid, sulfur dioxide, and total ammonium, nitrate, and sulfate, (c) total  $PM_{2.5}$ , the  $PM_{2.5}$  component of (d) ammonium, (e) nitrate, (f) sulfate, and precipitation concentrations of (g) ammonium, nitrate, and sulfate. The networks measuring each species is displayed in the legend of each panel.

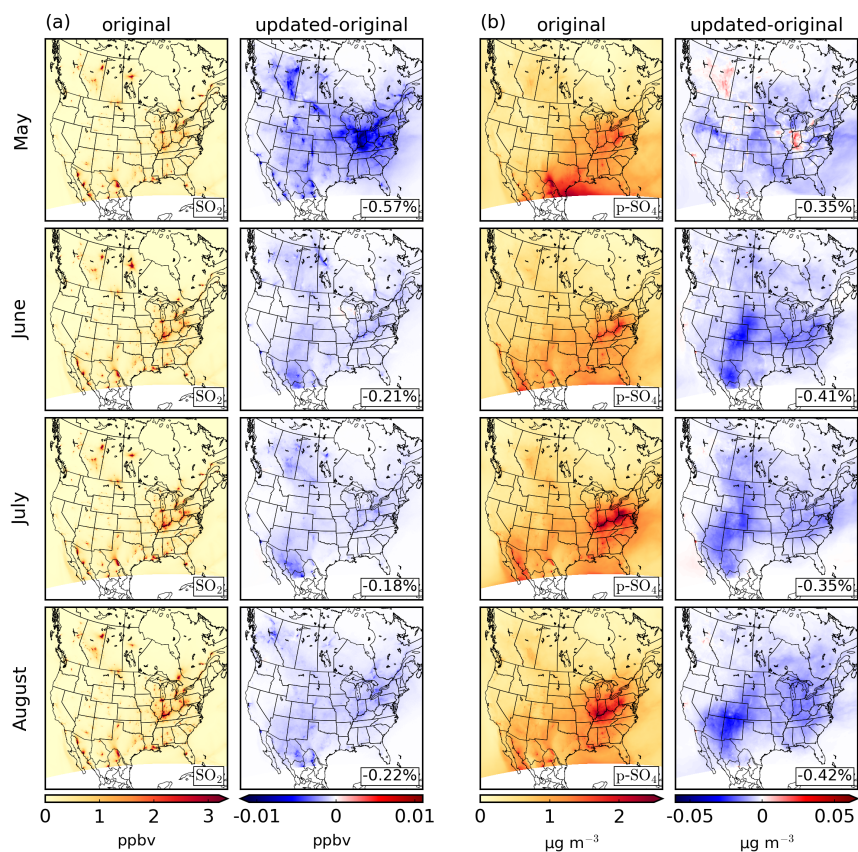

**Figure S3.** Monthly mean surface (a)  $\text{SO}_2$  VMR and (b)  $\text{p-SO}_4$  concentration fields from GEM-MACH for May to August 2016. In sub-figures (a) and (b), the left columns show the mean surface field when the original ammonia emissions are used and the right columns show the mean difference between the GEM-MACH runs with the updated ammonia emissions from the inversion and the original emissions. For plots in the right columns, the total difference over the model domain as a percentage of the original field is shown in the lower right corner. Plots for  $\text{p-SO}_4$  show the total sulfate mass over both aerosol size bins.

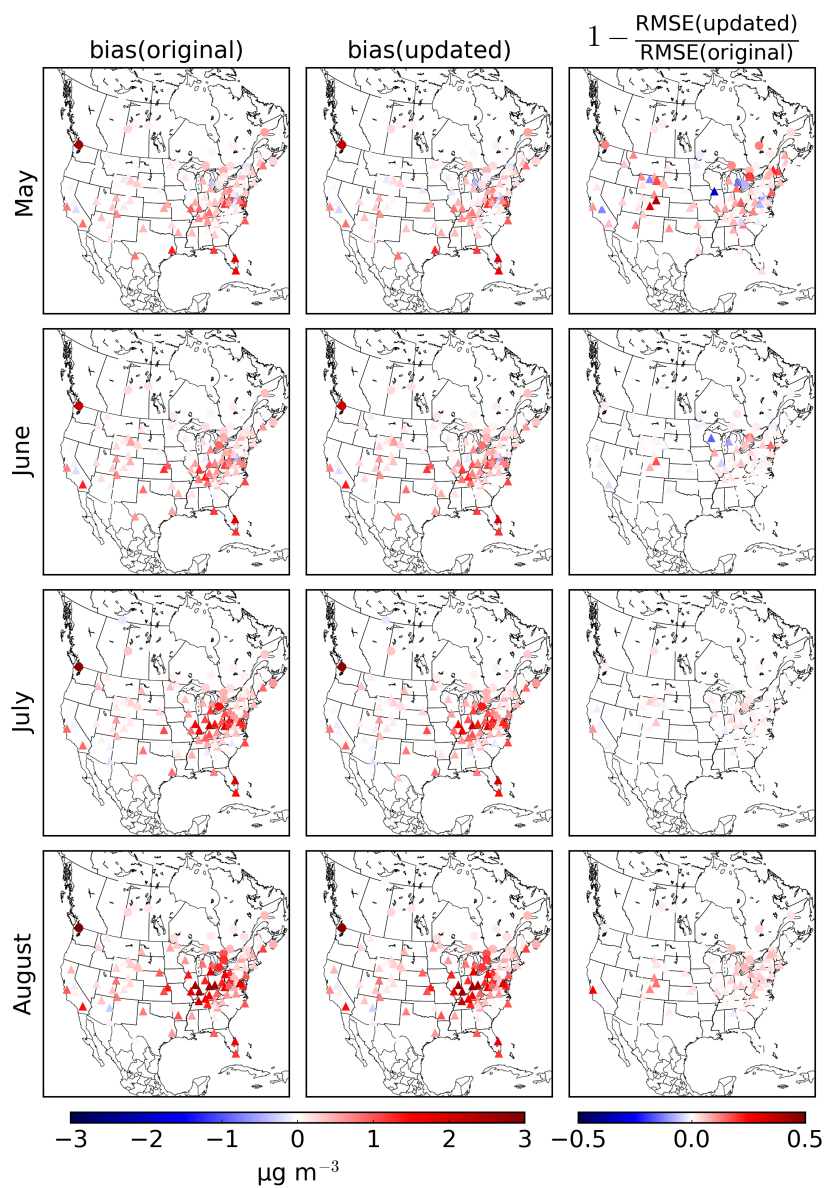

**Figure S4.** Comparison of  $\text{HNO}_3$  surface observations from the CAPMoN and CASTNET networks with GEM-MACH surface fields. The left and center columns show bias values for each station when the original and updated ammonia emissions are used, respectively. The right column shows the relative improvement of the root-mean-square error (RMSE) for each station. CAPMoN and CASTNET stations are denoted with circular and triangular markers, respectively.

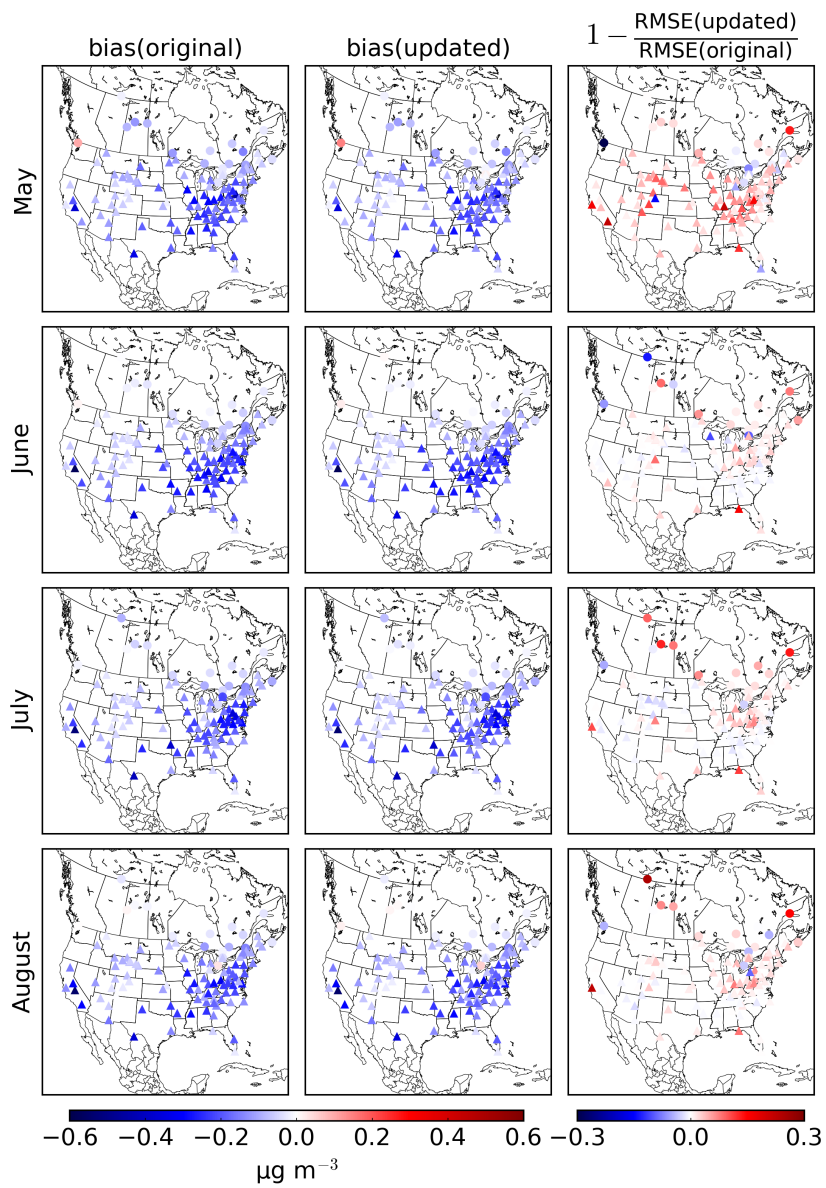

**Figure S5.** Same as Figure S4, but for p-NH<sub>4</sub>.

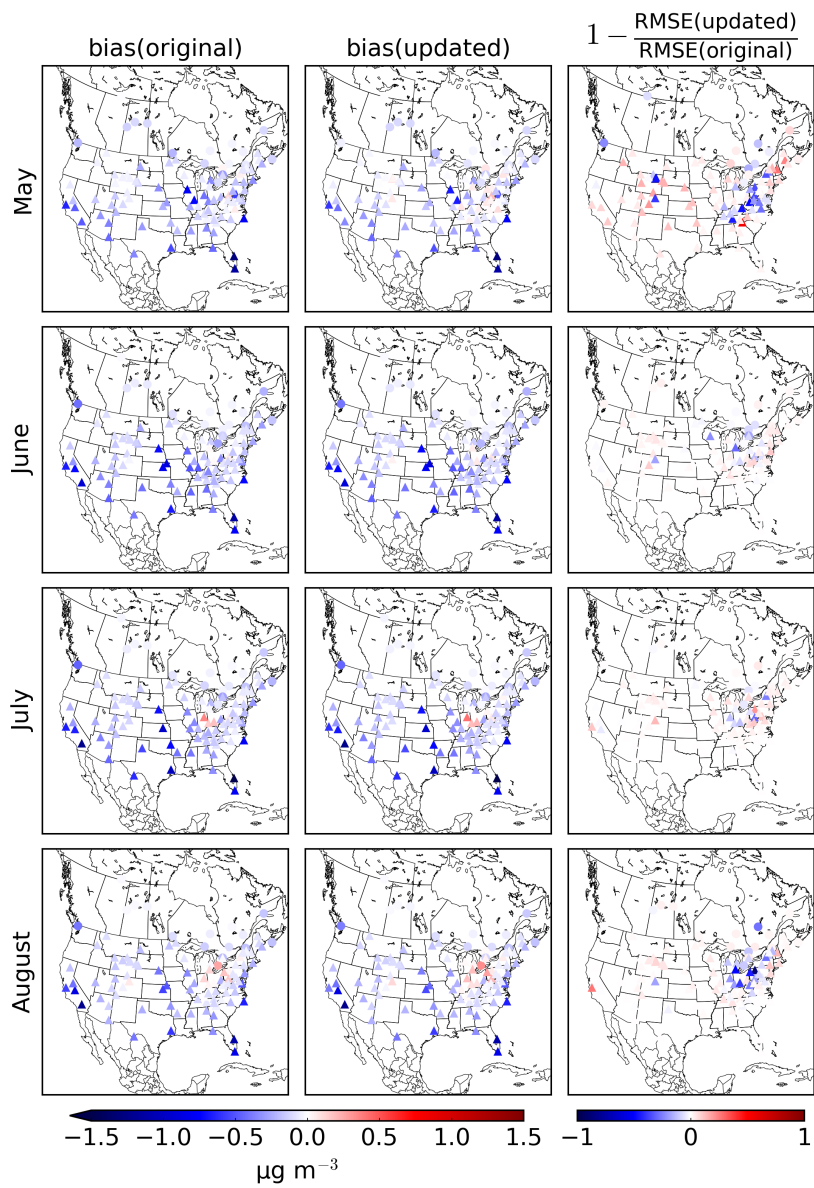

**Figure S6.** Same as Figure S4, but for p-NO<sub>3</sub>.

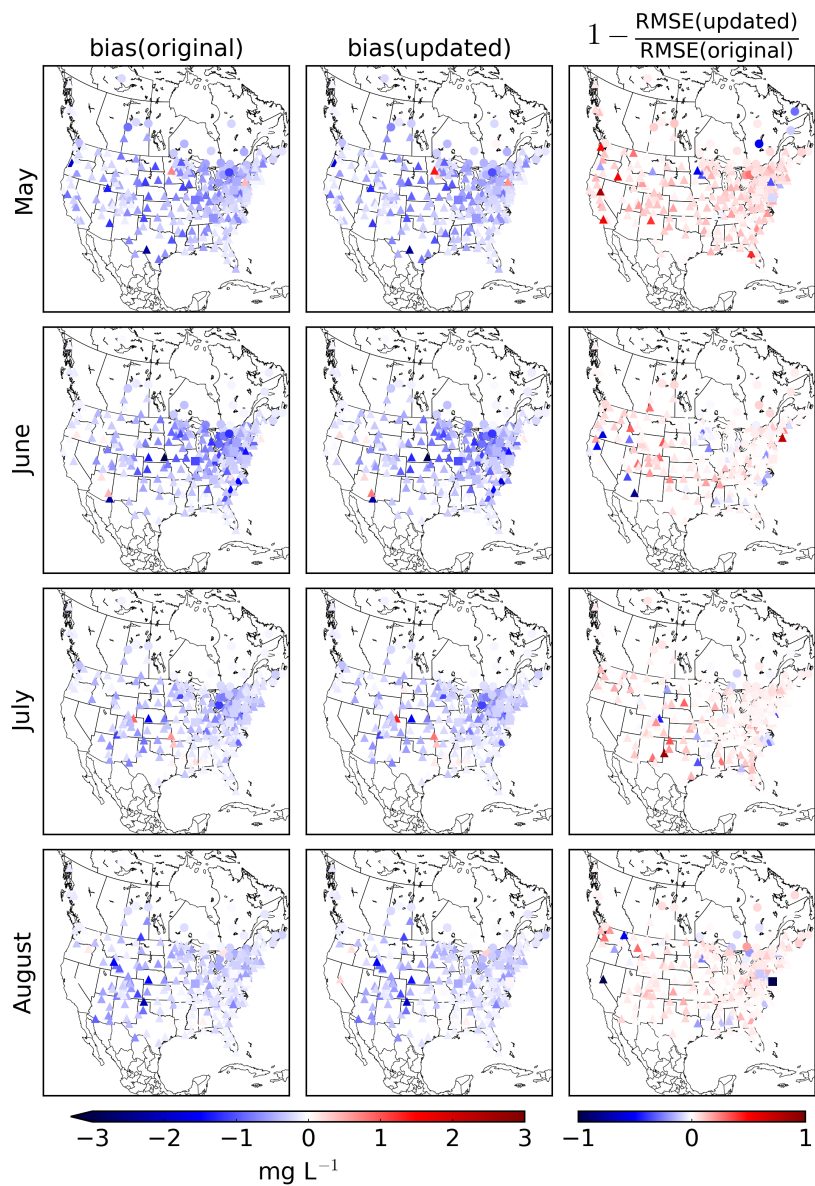

**Figure S7.** Same as Figure S4, but for precipitation-chemistry concentration observations of ammonium from the CAPMoN, NTN, and AIRMoN networks, which are denoted by circular, triangular, and square markers, respectively.



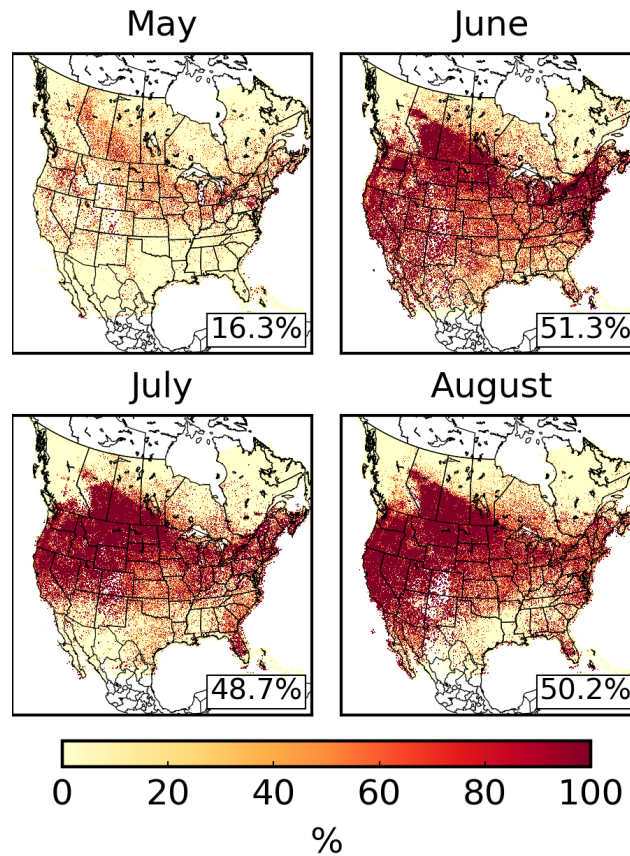

**Figure S8.** Fraction of the number of retrievals chosen to be compared with the model using the linearized averaging kernel in the hybrid method within each cell of the GEM-MACH grid. Percentages in the lower right corner show the percentage over the whole domain.

| species           | month  | network | $O$<br>( $\mu\text{g m}^{-3}$ ) | NMB (%)    |            | NSTD (%) |            | $\rho$     |         | N         |           |     |
|-------------------|--------|---------|---------------------------------|------------|------------|----------|------------|------------|---------|-----------|-----------|-----|
|                   |        |         |                                 | original   | updated    | original | updated    | original   | updated |           | sig       | sig |
| NH <sub>3</sub>   | May    | NAPS    | 3.84                            | -22.9±12.5 | -3.8±11.1  | 74       | 120.6±35.0 | 107.5±30.7 | 15      | 0.67±0.08 | 0.74±0.07 | 79  |
|                   |        | AMoN    | 1.82                            | -43.0±4.6  | -17.9±4.5  | 100      | 97.3±10.7  | 95.6±10.0  | 17      | 0.50±0.04 | 0.53±0.04 | 65  |
|                   | June   | NAPS    | 3.81                            | -46.3±15.1 | -36.9±14.8 | 35       | 143.1±62.7 | 140.0±60.5 | 3       | 0.74±0.07 | 0.72±0.07 | 30  |
|                   |        | AMoN    | 2.02                            | -4.2±5.2   | 3.7±5.0    | 73       | 99.2±11.0  | 96.2±10.8  | 31      | 0.44±0.05 | 0.48±0.05 | 61  |
|                   | July   | NAPS    | 3.14                            | -35.8±5.6  | -29.2±7.2  | 53       | 55.4±8.5   | 71.2±12.4  | 54      | 0.88±0.05 | 0.78±0.06 | 100 |
|                   |        | AMoN    | 1.87                            | -17.7±5.2  | -13.9±4.7  | 41       | 99.7±14.7  | 89.7±14.3  | 42      | 0.53±0.04 | 0.56±0.04 | 62  |
|                   | August | NAPS    | 3.48                            | -38.5±14.0 | -29.5±15.3 | 34       | 133.5±48.1 | 145.6±51.1 | 17      | 0.64±0.08 | 0.51±0.09 | 93  |
|                   |        | AMoN    | 1.79                            | -23.5±5.0  | -12.2±4.8  | 90       | 95.4±16.3  | 92.3±16.2  | 6       | 0.55±0.04 | 0.57±0.04 | 43  |
| p-NH <sub>4</sub> | May    | CAPMoN  | 0.20                            | -27.4±3.6  | -22.0±3.9  | 70       | 86.1±6.0   | 92.1±6.8   | 43      | 0.61±0.03 | 0.58±0.03 | 72  |
|                   |        | CASTNET | 0.36                            | -42.5±1.9  | -38.3±1.9  | 88       | 44.6±3.4   | 45.1±3.3   | 23      | 0.68±0.03 | 0.66±0.03 | 42  |
|                   | June   | CAPMoN  | 0.14                            | -31.4±3.9  | -26.2±4.0  | 65       | 91.1±8.4   | 94.6±9.7   | 20      | 0.58±0.03 | 0.55±0.04 | 64  |
|                   |        | CASTNET | 0.34                            | -48.1±1.7  | -47.6±1.7  | 15       | 35.9±1.5   | 36.0±1.5   | 4       | 0.73±0.03 | 0.73±0.03 | 21  |
|                   | July   | CAPMoN  | 0.19                            | -36.4±3.6  | -31.9±3.6  | 63       | 84.5±15.0  | 85.5±14.7  | 11      | 0.64±0.03 | 0.63±0.03 | 35  |
|                   |        | CASTNET | 0.36                            | -42.3±1.6  | -41.9±1.6  | 15       | 33.9±1.4   | 33.9±1.4   | 3       | 0.79±0.03 | 0.79±0.03 | 7   |
|                   | August | CAPMoN  | 0.18                            | -21.8±3.3  | -16.2±3.4  | 76       | 78.1±5.8   | 79.9±5.9   | 17      | 0.69±0.03 | 0.68±0.03 | 35  |
|                   |        | CASTNET | 0.36                            | -41.1±1.6  | -39.7±1.7  | 45       | 38.3±1.5   | 38.8±1.5   | 1       | 0.70±0.03 | 0.70±0.03 | 28  |

**Table S1.** Comparison of surface observations of NH<sub>3</sub> and p-NH<sub>4</sub> with GEM-MACH using the original and updated ammonia emissions for May to August 2016.

The normalized mean bias, normalized standard deviation of differences, and correlation coefficient are shown with their standard errors. The columns labeled 'sig' are the statistical significance (displayed as a percentage) of the difference between the original and updated statistical values. Values for ammonium are for the total mass over all aerosol sizes.

| species           | month  | network | $O$<br>( $\mu\text{g m}^{-3}$ ) | NMB (%)    |            | NSTD (%) |            | $\rho$     |         | N         |           |     |     |
|-------------------|--------|---------|---------------------------------|------------|------------|----------|------------|------------|---------|-----------|-----------|-----|-----|
|                   |        |         |                                 | original   | updated    | original | updated    | original   | updated |           | sig       | sig |     |
| HNO <sub>3</sub>  | May    | CAPMoN  | 0.39                            | 71.2±9.6   | 64.0±8.6   | 43       | 228.4±32.8 | 205.9±27.9 | 37      | 0.63±0.03 | 0.65±0.03 | 51  | 571 |
|                   |        | CASTNET | 0.62                            | 59.1±4.7   | 52.2±4.6   | 71       | 109.2±7.8  | 107.6±7.5  | 13      | 0.54±0.04 | 0.52±0.04 | 43  | 547 |
|                   | June   | CAPMoN  | 0.33                            | 93.3±10.4  | 90.1±10.0  | 18       | 243.2±25.8 | 234.9±25.2 | 15      | 0.70±0.03 | 0.70±0.03 | 8   | 552 |
|                   |        | CASTNET | 0.76                            | 53.7±3.1   | 52.8±3.1   | 16       | 67.7±3.2   | 67.2±3.1   | 11      | 0.68±0.03 | 0.68±0.03 | 3   | 465 |
|                   | July   | CAPMoN  | 0.37                            | 113.6±11.5 | 111.7±11.2 | 9        | 270.5±34.2 | 265.6±33.5 | 9       | 0.71±0.03 | 0.71±0.03 | 8   | 558 |
|                   |        | CASTNET | 0.73                            | 70.9±4.3   | 70.0±4.2   | 12       | 91.3±6.2   | 90.4±6.1   | 11      | 0.66±0.04 | 0.66±0.04 | 2   | 454 |
|                   | August | CAPMoN  | 0.32                            | 166.8±14.1 | 162.3±13.7 | 18       | 330.3±43.9 | 321.7±43.3 | 18      | 0.73±0.03 | 0.72±0.03 | 18  | 549 |
|                   |        | CASTNET | 0.65                            | 117.3±6.4  | 113.9±6.2  | 30       | 149.7±10.7 | 146.3±10.6 | 23      | 0.53±0.04 | 0.53±0.04 | 7   | 553 |
| p-NO <sub>3</sub> | May    | CAPMoN  | 0.26                            | -39.1±7.0  | -28.7±7.4  | 69       | 166.4±16.3 | 176.6±16.4 | 23      | 0.53±0.04 | 0.53±0.04 | 9   | 570 |
|                   |        | CASTNET | 0.38                            | -54.2±4.6  | -41.1±4.8  | 95       | 108.2±10.2 | 111.6±9.7  | 55      | 0.42±0.04 | 0.40±0.04 | 42  | 547 |
|                   | June   | CAPMoN  | 0.17                            | -72.9±6.5  | -67.7±6.9  | 42       | 153.2±17.4 | 163.0±23.9 | 3       | 0.31±0.04 | 0.32±0.04 | 24  | 552 |
|                   |        | CASTNET | 0.33                            | -74.1±4.0  | -71.9±4.0  | 31       | 86.0±4.5   | 87.1±4.5   | 16      | 0.21±0.05 | 0.20±0.05 | 20  | 465 |
|                   | July   | CAPMoN  | 0.17                            | -70.9±7.2  | -66.6±7.3  | 33       | 170.0±17.4 | 172.5±17.6 | 4       | 0.28±0.04 | 0.29±0.04 | 21  | 558 |
|                   |        | CASTNET | 0.31                            | -78.2±5.0  | -76.1±5.0  | 24       | 105.8±8.7  | 106.8±8.7  | 11      | 0.04±0.05 | 0.04±0.05 | 1   | 454 |
|                   | August | CAPMoN  | 0.18                            | -57.8±6.5  | -50.2±6.7  | 58       | 150.8±12.4 | 156.7±13.6 | 11      | 0.39±0.04 | 0.41±0.04 | 43  | 544 |
|                   |        | CASTNET | 0.27                            | -66.9±4.6  | -60.0±4.8  | 70       | 107.8±7.0  | 112.2±7.1  | 43      | 0.01±0.04 | 0.01±0.04 | 3   | 553 |

**Table S2.** Same as Table S1, but for surface observations of HNO<sub>3</sub> and p-NO<sub>3</sub>. Values for nitrate are for the total mass over all aerosol sizes.

| species           | month  | network | $O$<br>( $\mu\text{g m}^{-3}$ ) | NMB (%)    |            | NSTD (%) |            | $\rho$     |         | N         |           |     |     |
|-------------------|--------|---------|---------------------------------|------------|------------|----------|------------|------------|---------|-----------|-----------|-----|-----|
|                   |        |         |                                 | original   | updated    | original | updated    | original   | updated |           | sig       | sig |     |
| SO <sub>2</sub>   | May    | CAPMoN  | 0.23                            | 169.7±18.0 | 168.1±17.9 | 5        | 428.7±80.5 | 427.9±80.4 | 2       | 0.48±0.04 | 0         | 569 |     |
|                   |        | CASTNET | 0.41                            | 47.6±5.1   | 46.1±5.1   | 16       | 119.7±7.2  | 118.8±7.2  | 9       | 0.57±0.04 | 0.57±0.04 | 2   | 547 |
|                   | June   | CAPMoN  | 0.16                            | 205.1±16.2 | 204.1±16.2 | 3        | 380.7±25.5 | 380.5±25.5 | 1       | 0.49±0.04 | 0.49±0.04 | 0   | 549 |
|                   |        | CASTNET | 0.56                            | 18.7±5.2   | 18.5±5.2   | 3        | 112.1±7.5  | 112.0±7.5  | 1       | 0.44±0.04 | 0.44±0.04 | 1   | 465 |
|                   | July   | CAPMoN  | 0.18                            | 223.1±17.5 | 222.3±17.5 | 3        | 412.1±33.4 | 411.8±33.4 | 1       | 0.49±0.04 | 0.49±0.04 | 0   | 557 |
|                   |        | CASTNET | 0.54                            | 32.6±6.0   | 32.4±6.0   | 2        | 127.0±7.1  | 126.9±7.1  | 1       | 0.40±0.04 | 0.40±0.04 | 0   | 454 |
|                   | August | CAPMoN  | 0.17                            | 313.3±23.3 | 312.1±23.3 | 3        | 547.6±61.2 | 547.1±61.2 | 2       | 0.46±0.04 | 0.46±0.04 | 0   | 551 |
|                   |        | CASTNET | 0.47                            | 55.9±7.6   | 55.5±7.5   | 3        | 177.6±13.7 | 177.5±13.7 | 1       | 0.37±0.04 | 0.37±0.04 | 0   | 553 |
| p-SO <sub>4</sub> | May    | CAPMoN  | 0.56                            | -48.4±2.8  | -48.8±2.8  | 8        | 66.8±4.4   | 67.3±4.5   | 5       | 0.70±0.03 | 0.70±0.03 | 17  | 570 |
|                   |        | CASTNET | 1.01                            | -57.3±1.7  | -57.5±1.7  | 7        | 40.2±1.7   | 40.3±1.7   | 3       | 0.72±0.03 | 0.72±0.03 | 6   | 547 |
|                   | June   | CAPMoN  | 0.41                            | -40.3±3.3  | -40.7±3.3  | 8        | 77.9±5.3   | 77.9±5.3   | 2       | 0.65±0.03 | 0.65±0.03 | 8   | 552 |
|                   |        | CASTNET | 1.03                            | -59.7±2.0  | -60.1±2.0  | 11       | 43.7±1.9   | 43.7±1.9   | 2       | 0.73±0.03 | 0.74±0.03 | 19  | 465 |
|                   | July   | CAPMoN  | 0.60                            | -45.1±4.1  | -45.5±4.1  | 6        | 96.1±18.1  | 96.2±18.2  | 1       | 0.62±0.03 | 0.62±0.03 | 3   | 558 |
|                   |        | CASTNET | 1.17                            | -55.1±1.9  | -55.5±1.9  | 11       | 40.1±1.7   | 40.0±1.7   | 1       | 0.75±0.03 | 0.76±0.03 | 11  | 454 |
|                   | August | CAPMoN  | 0.58                            | -39.1±3.3  | -39.6±3.3  | 10       | 77.2±4.9   | 77.1±4.9   | 0       | 0.68±0.03 | 0.68±0.03 | 10  | 549 |
|                   |        | CASTNET | 1.08                            | -52.3±1.7  | -52.8±1.7  | 15       | 39.9±1.4   | 39.9±1.4   | 1       | 0.71±0.03 | 0.71±0.03 | 10  | 553 |

**Table S3.** Same as Table S1, but for surface observations of SO<sub>2</sub> and p-SO<sub>4</sub>. Values for sulfate are for the total mass over all aerosol sizes.

| species       | month  | network | $O$<br>( $\text{mg L}^{-1}$ ) | NMB (%)    |            | NSTD (%)   |            | $\rho$     |            | N   |
|---------------|--------|---------|-------------------------------|------------|------------|------------|------------|------------|------------|-----|
|               |        |         |                               | original   | updated    | original   | updated    | original   | updated    | sig |
| $\text{NH}_4$ | May    | CAPMoN  | 0.44                          | -73.2±6.1  | -64.9±6.0  | 96.8±7.2   | 95.8±7.7   | 0.54±0.05  | 0.55±0.05  | 3   |
|               |        | NTN     | 0.48                          | -76.4±3.6  | -68.5±3.9  | 98.1±10.2  | 104.6±13.1 | 0.21±0.04  | 0.21±0.04  | 4   |
|               |        | AIRMoN  | 0.58                          | -77.8±10.6 | -71.1±10.6 | 85.3±8.7   | 85.8±8.8   | 0.27±0.12  | 0.29±0.12  | 13  |
|               | June   | CAPMoN  | 0.34                          | -76.6±9.0  | -73.6±8.9  | 141.3±18.3 | 140.7±18.0 | 0.46±0.06  | 0.46±0.06  | 1   |
|               |        | NTN     | 0.55                          | -74.5±3.9  | -72.9±4.0  | 83.6±7.0   | 85.1±7.0   | 0.38±0.04  | 0.33±0.04  | 73  |
|               |        | AIRMoN  | 0.66                          | -70.3±13.9 | -69.0±13.9 | 82.5±13.8  | 82.2±13.7  | -0.00±0.17 | -0.00±0.17 | 2   |
|               | July   | CAPMoN  | 0.32                          | -64.4±8.4  | -59.7±8.3  | 131.8±17.0 | 130.6±16.7 | 0.49±0.06  | 0.50±0.06  | 16  |
|               |        | NTN     | 0.42                          | -67.2±3.7  | -63.9±3.7  | 86.6±8.4   | 88.0±8.8   | 0.30±0.04  | 0.30±0.04  | 0   |
|               |        | AIRMoN  | 0.38                          | -61.4±10.9 | -58.2±11.1 | 69.9±7.0   | 71.0±7.0   | 0.30±0.15  | 0.29±0.15  | 4   |
|               | August | CAPMoN  | 0.29                          | -59.4±8.5  | -51.5±8.9  | 135.1±14.1 | 141.4±16.1 | 0.26±0.06  | 0.25±0.06  | 12  |
|               |        | NTN     | 0.37                          | -75.2±4.4  | -71.3±4.4  | 117.8±22.0 | 116.6±22.0 | 0.39±0.03  | 0.40±0.03  | 24  |
|               |        | AIRMoN  | 0.28                          | -75.7±15.0 | -71.8±15.5 | 93.8±11.8  | 96.5±13.0  | -0.02±0.16 | -0.02±0.16 | 0   |
| $\text{NO}_3$ | May    | CAPMoN  | 0.98                          | -81.6±6.3  | -81.3±6.3  | 103.5±10.0 | 102.9±9.7  | 0.68±0.05  | 0.68±0.05  | 4   |
|               |        | NTN     | 0.95                          | -82.6±3.7  | -82.4±3.7  | 99.9±21.1  | 100.1±21.2 | 0.26±0.04  | 0.25±0.04  | 23  |
|               |        | AIRMoN  | 1.16                          | -82.3±9.3  | -82.3±9.3  | 74.9±10.4  | 74.9±10.4  | 0.10±0.13  | 0.09±0.13  | 1   |
|               | June   | CAPMoN  | 0.74                          | -84.9±8.8  | -84.9±8.8  | 141.0±25.8 | 141.0±25.8 | 0.53±0.05  | 0.53±0.05  | 1   |
|               |        | NTN     | 1.10                          | -85.4±3.5  | -85.4±3.5  | 76.0±7.4   | 75.9±7.3   | 0.11±0.05  | 0.11±0.05  | 1   |
|               |        | AIRMoN  | 1.31                          | -83.2±11.7 | -83.3±11.7 | 68.1±7.7   | 68.1±7.7   | 0.05±0.18  | 0.05±0.18  | 1   |
|               | July   | CAPMoN  | 0.83                          | -77.1±7.3  | -77.2±7.3  | 114.8±13.9 | 115.0±14.0 | 0.48±0.06  | 0.48±0.06  | 5   |
|               |        | NTN     | 1.16                          | -85.2±3.0  | -85.2±3.0  | 70.3±6.0   | 70.3±6.0   | 0.22±0.04  | 0.22±0.04  | 2   |
|               |        | AIRMoN  | 1.32                          | -85.1±12.6 | -85.1±12.6 | 82.8±18.7  | 82.7±18.7  | 0.08±0.16  | 0.08±0.16  | 0   |
|               | August | CAPMoN  | 0.71                          | -70.9±7.9  | -70.8±7.9  | 126.0±17.3 | 126.2±17.3 | 0.24±0.06  | 0.24±0.06  | 2   |
|               |        | NTN     | 0.92                          | -83.9±3.5  | -83.9±3.5  | 95.0±15.5  | 95.0±15.5  | 0.32±0.04  | 0.32±0.04  | 2   |
|               |        | AIRMoN  | 0.84                          | -85.7±9.4  | -85.7±9.4  | 58.9±6.0   | 58.9±6.0   | 0.13±0.16  | 0.13±0.16  | 0   |

**Table S4.** Same as Table S1, but for precipitation-chemistry concentration observations of ammonium and nitrate.

| species         | month  | network | $O$<br>( $\text{mg L}^{-1}$ ) | NMB (%)    |            | NSTD (%)    |             | $\rho$     |            | N   |
|-----------------|--------|---------|-------------------------------|------------|------------|-------------|-------------|------------|------------|-----|
|                 |        |         |                               | original   | updated    | original    | updated     | original   | updated    | sig |
| SO <sub>4</sub> | May    | CAPMoN  | 0.84                          | -82.3±10.5 | -82.3±10.5 | 172.1±54.3  | 172.0±54.3  | 0.31±0.06  | 0.32±0.06  | 3   |
|                 |        | NTN     | 0.74                          | -84.6±17.1 | -84.3±17.1 | 461.8±224.7 | 461.6±224.7 | 0.10±0.04  | 0.10±0.04  | 20  |
|                 |        | AIRMoN  | 0.77                          | -80.2±9.5  | -80.0±9.5  | 76.6±14.0   | 76.5±14.0   | 0.12±0.13  | 0.13±0.12  | 4   |
|                 | June   | CAPMoN  | 0.51                          | -80.6±7.6  | -80.6±7.6  | 121.3±24.6  | 121.2±24.6  | 0.34±0.06  | 0.34±0.06  | 3   |
|                 |        | NTN     | 0.67                          | -85.0±3.6  | -84.8±3.6  | 77.2±6.7    | 77.2±6.7    | 0.13±0.05  | 0.14±0.05  | 8   |
|                 |        | AIRMoN  | 0.74                          | -76.2±13.8 | -76.2±13.7 | 80.2±15.3   | 80.0±15.3   | -0.12±0.18 | -0.12±0.18 | 2   |
|                 | July   | CAPMoN  | 0.49                          | -75.1±6.7  | -74.9±6.7  | 106.7±11.3  | 106.5±11.3  | 0.37±0.06  | 0.37±0.06  | 5   |
|                 |        | NTN     | 0.67                          | -84.1±3.3  | -83.9±3.3  | 77.6±7.5    | 77.6±7.5    | 0.23±0.04  | 0.23±0.04  | 0   |
|                 |        | AIRMoN  | 0.76                          | -82.3±12.2 | -82.2±12.2 | 79.9±11.6   | 79.8±11.6   | 0.10±0.16  | 0.10±0.16  | 2   |
|                 | August | CAPMoN  | 0.52                          | -72.5±8.1  | -72.3±8.1  | 129.4±21.9  | 129.6±21.9  | 0.20±0.06  | 0.20±0.06  | 3   |
|                 |        | NTN     | 0.57                          | -83.1±6.6  | -82.9±6.6  | 177.3±74.3  | 177.3±74.3  | 0.22±0.04  | 0.22±0.04  | 4   |
|                 |        | AIRMoN  | 0.58                          | -83.1±11.4 | -83.0±11.4 | 71.3±7.5    | 71.4±7.5    | 0.01±0.16  | 0.01±0.16  | 1   |

**Table S5.** Same as Table S1, but for precipitation-chemistry concentration observations of sulfate.
